# Supplementary material for: Facile synthesis of Fe-based metal–organic frameworks from Fe2O3 nanoparticles and their application for CO2/N2 separation
Source: publisher site journal article supplement (doi:10.3762/bjnano.15.74), 2024-07-19
Supplement: Additional file 1 [file 2190-4286-15-74-S1.pdf]

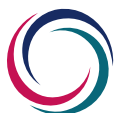

## Supporting Information

for

### **Facile synthesis of Fe-based metal–organic frameworks from Fe<sub>2</sub>O<sub>3</sub> nanoparticles and their application for CO<sub>2</sub>/N<sub>2</sub> separation**

Van Nhieu Le, Hoai Duc Tran, Minh Tien Nguyen, Hai Bang Truong, Toan Minh Pham and Jinsoo Kim

*Beilstein J. Nanotechnol.* **2024**, *15*, 897–908. [doi:10.3762/bjnano.15.74](https://doi.org/10.3762/bjnano.15.74)

## Additional experimental data

### **Preparation of the reference MIL-100(Fe) sample**

The reaction mixture was prepared with a molar composition of 1.0 Fe: 0.67 H<sub>3</sub>BTC: 1.2 HNO<sub>3</sub>: 2.0 HF: 280 H<sub>2</sub>O in a 100 mL Teflon-lined autoclave. It was stirred for 20 min at ambient temperature. Subsequently, the mixture was tightly sealed and incubated at 160 °C for 24 h in an electric oven. Afterward, it was cooled down to room temperature. The MIL-100(Fe) was then retrieved from the orange slurry after centrifugation and subjected to multiple washes with dimethylformamide and ethanol to eliminate any residual reactants from the product mixture. Finally, the MIL-100(Fe) was left to dry overnight at 70 °C.

**Table S1:** The characteristic parameters alongside correlation coefficients from fitting the Langmuir–Freundlich (L–F) model.

| Samples                                      | The obtained parameters from fitting CO <sub>2</sub> |                          |         |        |
|----------------------------------------------|------------------------------------------------------|--------------------------|---------|--------|
|                                              | $q_{\text{sat}}$ (mmol·g <sup>-1</sup> )             | $a$ (kPa <sup>-1</sup> ) | $n$     | $R^2$  |
| M-100Fe@Fe <sub>2</sub> O <sub>3</sub> #0.90 | 3.59748                                              | 0.00225                  | 0.96613 | 0.9999 |
| M-100Fe@Fe <sub>2</sub> O <sub>3</sub> #1.35 | 4.47178                                              | 0.0035                   | 0.91115 | 0.9999 |
| M-100Fe@Fe <sub>2</sub> O <sub>3</sub> #1.80 | 5.75658                                              | 0.00417                  | 0.87543 | 0.9998 |
| M-100Fe@Fe <sub>2</sub> O <sub>3</sub> #2.25 | 6.31350                                              | 0.00446                  | 0.8521  | 0.9998 |
| MIL-100(Fe)                                  | 5.29325                                              | 0.00873                  | 0.86948 | 0.9998 |

| Samples                                      | The obtained parameters from fitting N <sub>2</sub> |                          |         |        |
|----------------------------------------------|-----------------------------------------------------|--------------------------|---------|--------|
|                                              | $q_{\text{sat}}$ (mmol·g <sup>-1</sup> )            | $a$ (kPa <sup>-1</sup> ) | $n$     | $R^2$  |
| M-100Fe@Fe <sub>2</sub> O <sub>3</sub> #0.90 | 0.48828                                             | 0.00143                  | 1.02837 | 0.9998 |
| M-100Fe@Fe <sub>2</sub> O <sub>3</sub> #1.35 | 0.97068                                             | 0.00123                  | 0.94648 | 0.9999 |
| M-100Fe@Fe <sub>2</sub> O <sub>3</sub> #1.80 | 1.28516                                             | 0.00119                  | 0.94557 | 0.9999 |
| M-100Fe@Fe <sub>2</sub> O <sub>3</sub> #2.25 | 1.60773                                             | 0.00111                  | 0.91890 | 0.9999 |
| MIL-100(Fe)                                  | 0.65055                                             | 0.00372                  | 0.97849 | 0.9998 |

The Langmuir–Freundlich (L–F) model is described as the following equation [1,2]:

$$q = q_{\text{sat}} \frac{ap^n}{1+ap^n} \quad (1)$$

Where  $q$  (mmol·g<sup>-1</sup>) stands for the uptake amount;  $q_{\text{sat}}$  (mmol·g<sup>-1</sup>) stands for the saturation uptake capacity on the adsorptive sites;  $p$  (kPa) is the pressure of bulk gas at equilibrium with the adsorbed phase;  $a$  (kPa<sup>-1</sup>) is the affinity coefficient of the sites;  $n$  is the coefficient of the L–F model.

The CO<sub>2</sub>/N<sub>2</sub> selectivity was calculated using the formula as below [3]:

$$S_{\text{CO}_2/\text{N}_2} = \frac{q_{\text{CO}_2}/p_{\text{CO}_2}}{q_{\text{N}_2}/p_{\text{N}_2}} \quad (2)$$

Where  $q_{\text{CO}_2}$  and  $q_{\text{N}_2}$  are loading amounts of  $\text{CO}_2$  and  $\text{N}_2$  in  $\text{mmol g}^{-1}$  estimated by IAST, respectively.  $p_{\text{CO}_2}$  and  $p_{\text{N}_2}$  are the partial pressure of  $\text{CO}_2$  and  $\text{N}_2$  in kPa, respectively.

The Clausius–Clayperon equation is described as the following equation [1,4]:

$$\ln P = -\frac{Q_{st}}{RT} + C \quad (3)$$

Herein,  $P$  is the pressure in kPa,  $R$  is the ideal gas constant in  $\text{J mol}^{-1} \text{K}^{-1}$ ,  $T$  is the absolute temperature in K, and  $C$  is the constant in the dimensionless unit.

**Table S2:** Compared  $\text{CO}_2$  uptake capacity on various adsorbents at 1 bar.

| Adsorbents                                   | Adsorption capacity ( $\text{mmol}\cdot\text{g}^{-1}$ )                  | Temperature (K) | References |
|----------------------------------------------|--------------------------------------------------------------------------|-----------------|------------|
| ZSM-5                                        | 1.50                                                                     | 303             | [5]        |
| MCM-41                                       | 0.79                                                                     | 298             | [6]        |
| Mesoporous alumina                           | 1.18                                                                     | 298             | [7]        |
| SBA-15                                       | 0.47                                                                     |                 |            |
| $\gamma$ -Alumina                            | 0.68                                                                     |                 |            |
| Zeolite-13X                                  | 1.70                                                                     | 298             | [8]        |
| ZIF-8                                        | 0.83                                                                     | 298             | [9]        |
| ZIF-70                                       | 1.43                                                                     |                 |            |
| UIO-66                                       | 1.79                                                                     | 298             | [10]       |
| d-UiO-6-2.0HCl                               | 1.42                                                                     | 298             | [11]       |
| UiO-66 FA mod                                | 1.44                                                                     | 298             | [12]       |
| MF-MOF-801                                   | 1.37                                                                     | 298             | [13]       |
| MF-MOF-804                                   | 1.00                                                                     |                 |            |
| MW-MIL-100(Fe)                               | 1.50 (1981 $\text{m}^2\cdot\text{g}^{-1\#}$ ; 250 $^\circ\text{C}^*$ )   | 298             | [14]       |
| MIL-100(Fe)                                  | 1.29 (1107 $\text{m}^2\cdot\text{g}^{-1\#}$ ; 120 $^\circ\text{C}^*$ )   | 298             | [15]       |
| MIL-100(Fe)                                  | 0.92 (1083 $\text{m}^2\cdot\text{g}^{-1\#}$ ; 150 $^\circ\text{C}^*$ )   | 298             | [16]       |
| MIL-100(Fe)                                  | 1.77 (1825.4 $\text{m}^2\cdot\text{g}^{-1\#}$ ; 150 $^\circ\text{C}^*$ ) | 298             | This work  |
| M-100Fe@Fe <sub>2</sub> O <sub>3</sub> #1.80 | 1.11 (1365.4 $\text{m}^2\cdot\text{g}^{-1\#}$ ; 150 $^\circ\text{C}^*$ ) |                 |            |

# BET surface area; \*Activation temperature before measuring  $\text{CO}_2$  adsorption capacity over the adsorbents

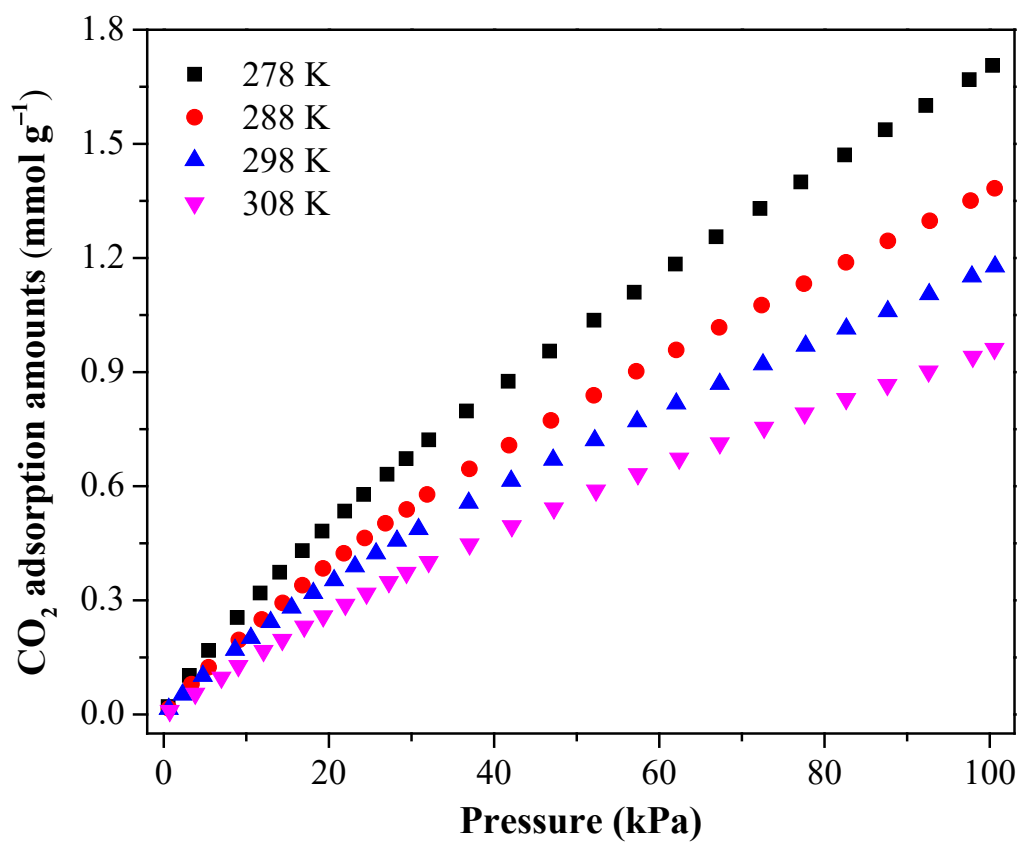

**Figure S1:** CO<sub>2</sub> isotherms at several different temperatures on M-100(Fe)@Fe<sub>2</sub>O<sub>3</sub>#1.80 sample.

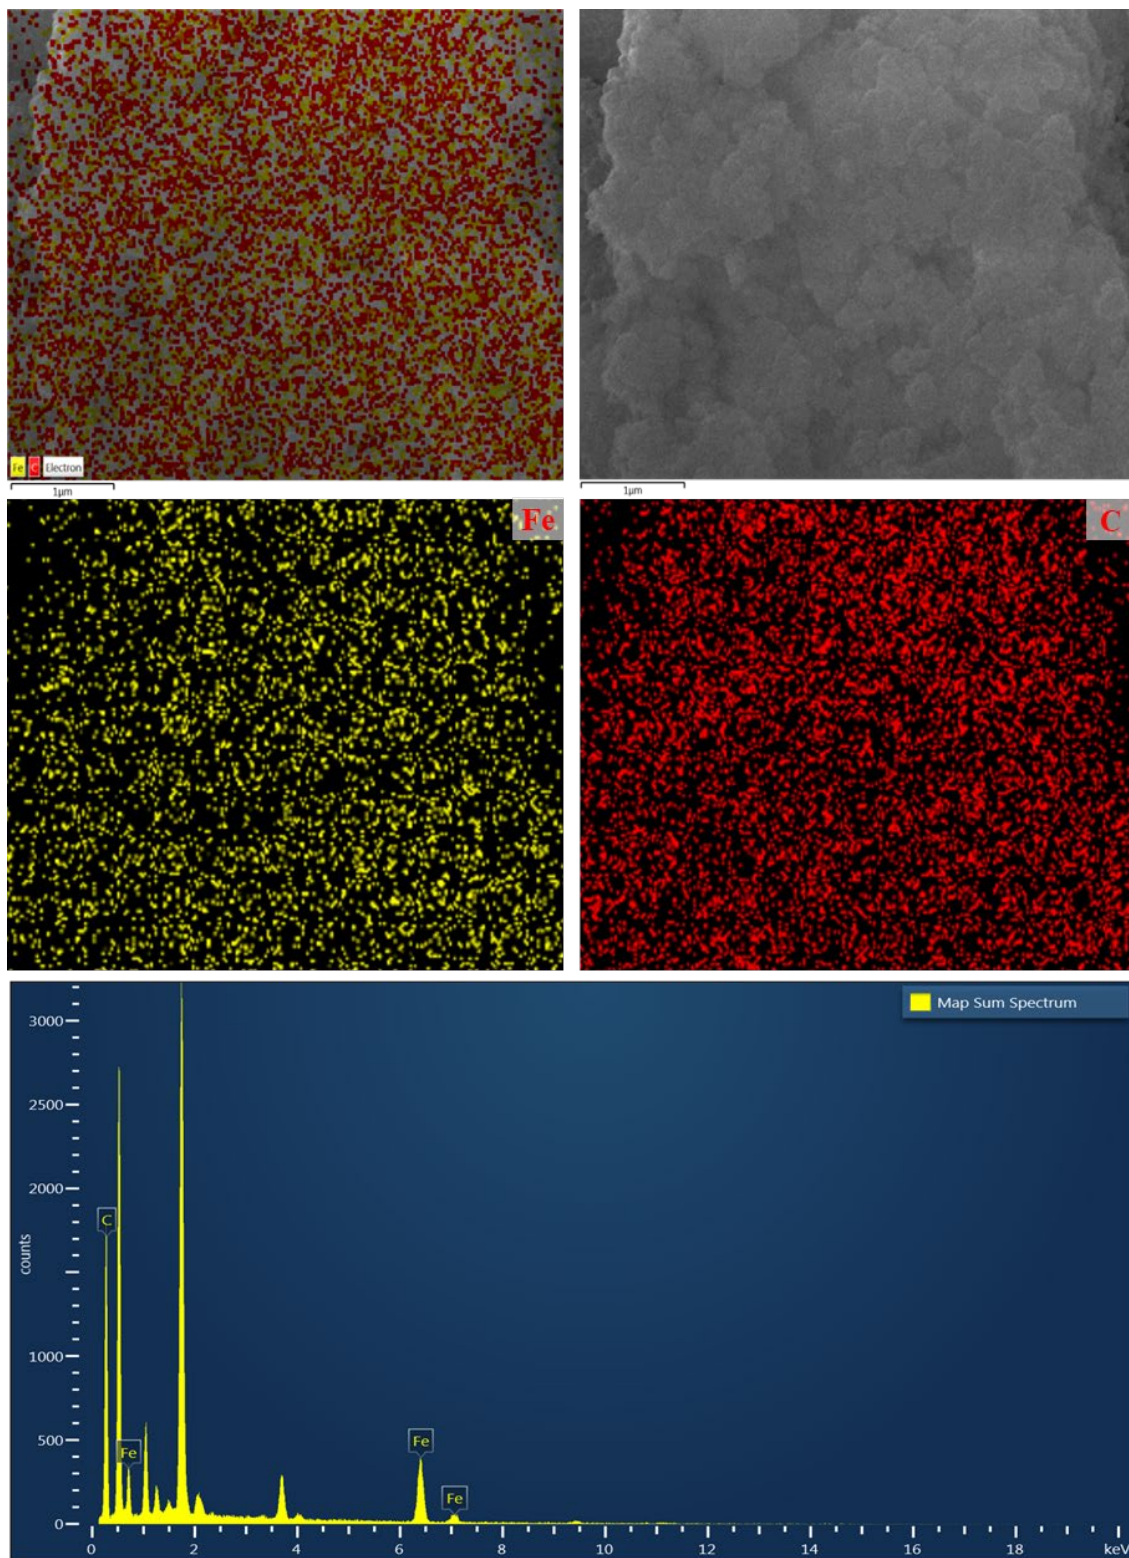

**Figure S2:** EDX mapping of elemental Fe and C on the M-100Fe@Fe<sub>2</sub>O<sub>3</sub>#1.80 sample

## References

1. Le, V. N.; Nguyen, V. C.; Nguyen, H. T.; Tran, H. D.; Tu, T. N.; Kim, W.-S.; Kim, J. *Microporous Mesoporous Mater.* **2023**, *360*, 112716.
2. Le, V. N.; Vo, T. K.; Yoo, K. S.; Kim, J. *Sep. Purif. Technol.* **2021**, *274*, 119079.
3. Le, V. N.; Vo, T. K.; Lee, J. H.; Kim, J. C.; Kim, T.-H.; Oh, K. H.; Bae, Y.-S.; Kwak, S. K.; Kim, J. *Chem. Eng. J.* **2021**, *404*, 126492.
4. Peng, J.; Xian, S.; Xiao, J.; Huang, Y.; Xia, Q.; Wang, H.; Li, Z. *Chem. Eng. J.* **2015**, *270*, 282-289.
5. Li, Y.; Yi, H.; Tang, X.; Li, F.; Yuan, Q. *Chem. Eng. J.* **2013**, *229*, 50-56.
6. Chanapatttharapol, K. C.; Krachumram, S.; Youngme, S. *Microporous Mesoporous Mater.* **2017**, *245*, 8-15.
7. Chen, C.; Ahn, W.-S. *Chem. Eng. J.* **2011**, *166*, 646-651.
8. McEwen, J.; Hayman, J.-D.; Ozgur Yazaydin, A. *Chem. Phys.* **2013**, *412*, 72-76.
9. Banerjee, R.; Furukawa, H.; Britt, D.; Knobler, C.; O'Keeffe, M.; Yaghi, O. M. *J. Am. Chem. Soc.* **2009**, *131*, 3875-3877.
10. Hu, Z.; Khurana, M.; Seah, Y. H.; Zhang, M.; Guo, Z.; Zhao, D. *Chem. Eng. Sci.* **2015**, *124*, 61-69.
11. Liang, W.; Coghlan, C. J.; Ragon, F.; Rubio-Martinez, M.; D'Alessandro, D. M.; Babarao, R. *Dalton Trans.* **2016**, *45*, 4496-4500.
12. Koutsianos, A.; Kazimierska, E.; Barron, A. R.; Taddei, M.; Andreoli, E. *Dalton Trans.* **2019**, *48*, 3349-3359.
13. Wang, Y.; Li, L.; Yan, L.; Cao, L.; Dai, P.; Gu, X.; Zhao, X. *Chin. Chem. Lett.* **2018**, *29*, 849-853.
14. Le, V. N.; Kwon, H. T.; Vo, T. K.; Kim, J.-H.; Kim, W.-S.; Kim, J. *Mater. Chem. Phys.* **2020**, *253*, 123278.
15. Mutyala, S.; Yakout, S. M.; Ibrahim, S. S.; Jonnalagadda, M.; Mitta, H. *New J. Chem.* **2019**, *43*, 9725-9731.
16. Ben-Mansour, R.; Qasem, N. A. A.; Habib, M. A. *Int. J. Energy Environ. Eng.* **2018**, *9*, 169-185.
